# Supplementary material for: Association of Serum High-Density Lipoprotein Cholesterol with High Blood Pressures at Checkup: Results of Kanagawa Investigation of Total Checkup Data from the National Database-9 (KITCHEN-9)
Source: MDPI journal article supplement (doi:10.3390/jcm10215118), 2021-10-30
Supplement: s1 [file s1]

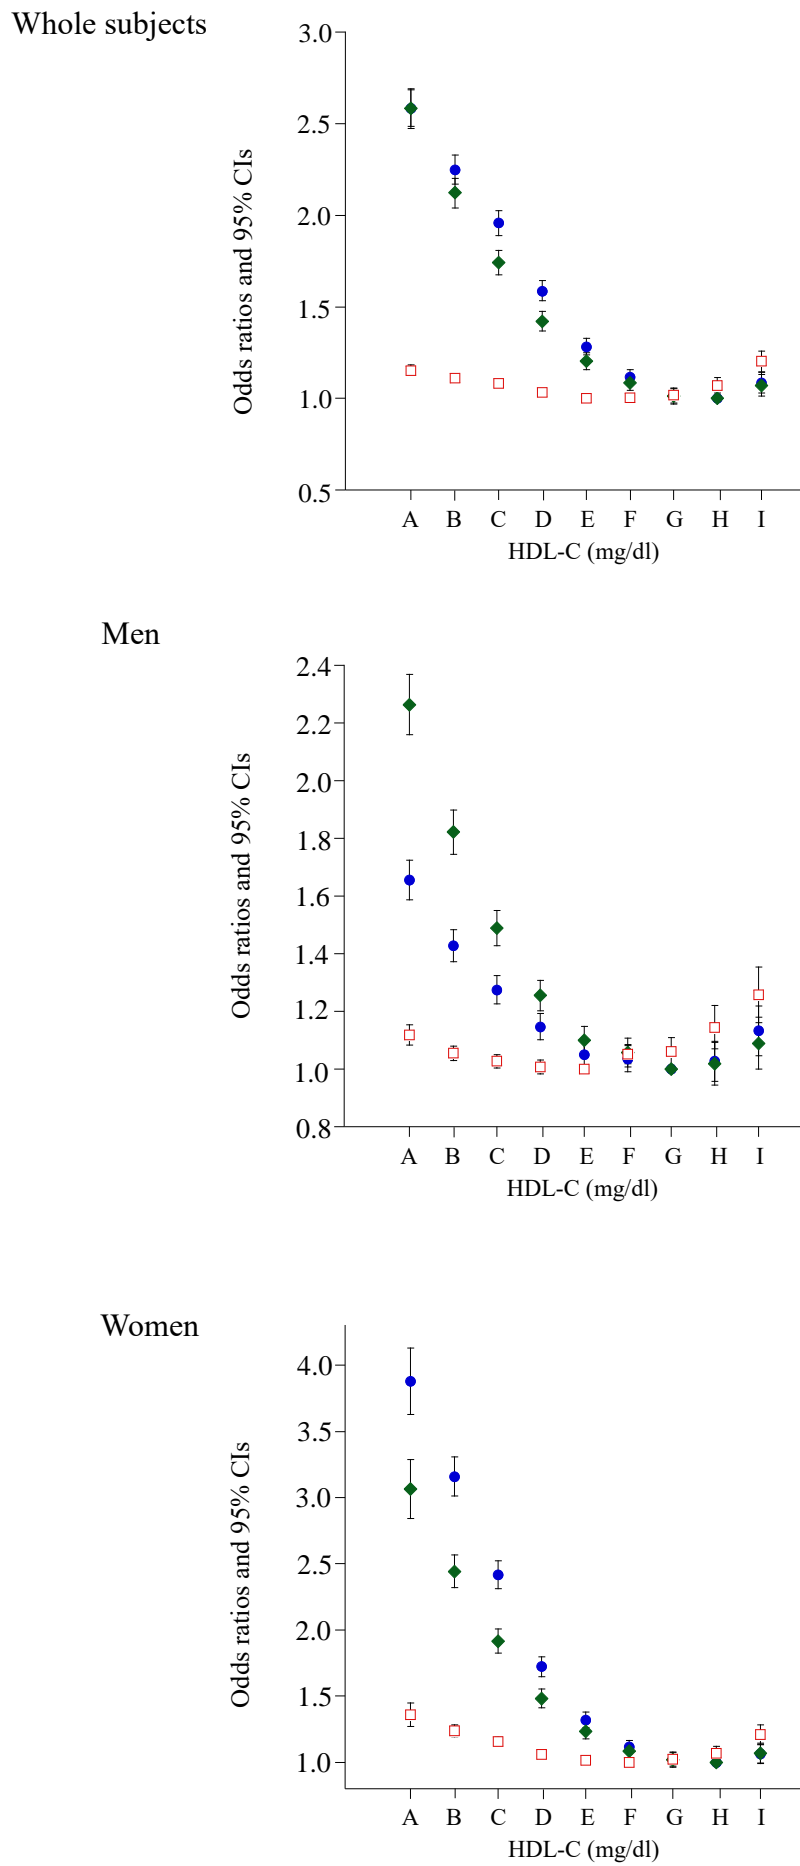

**Figure S1:** Odds ratios of nine HDL-C concentration categories for pharmacotherapy for hyper-tension.
